# Supplementary material
Source: PubMed Central journal article supplement (PMC7052791)
Supplement: jamainternmed-180-698-s001.pdf [file jamainternmed-180-698-s001.pdf]

## Supplementary Online Content

Simpson TF, Salazar JW, Vittinghoff E, et al. Association of QT-prolonging medications with risk of autopsy-defined causes of sudden death. Published online March 2, 2020. *JAMA Intern Med*. doi:10.1001/jamainternmed.2020.0148

**eTable.** Prescription Drug Use by Number of Subjects, QTPM Risk, and Autopsy-Adjudicated Cause of Sudden Death

This supplementary material has been provided by the authors to give readers additional information about their work.

**eTable.** Prescription Drug Use by Number of Subjects, QTPM Risk, and Autopsy-Adjudicated Cause of Sudden Death

| Patient Medication     | QT Risk     | Drug Class       | Presumed SCD (n=525) | Autopsy-defined SAD (n=293) | Non-SAD (n=232) | Trauma Deaths (n=104) |
|------------------------|-------------|------------------|----------------------|-----------------------------|-----------------|-----------------------|
| Amitriptyline          | Conditional | Psych            | 5 (1.0%)             | 1 (0.3%)                    | 4 (1.7%)        | 1 (1.0%)              |
| Atazanavir             | Conditional | Anti-infective   | 4 (0.8%)             | 1 (0.3%)                    | 3 (1.3%)        | 0 (0%)                |
| Atropine/Diphenoxylate | Conditional | Gastrointestinal | 1 (0.2%)             | 0 (0%)                      | 1 (0.4%)        | 0 (0%)                |
| Dexlansoprazole        | Conditional | Gastrointestinal | 1 (0.2%)             | 1 (0.3%)                    | 0 (0%)          | 0 (0%)                |
| Diphenhydramine        | Conditional | Other            | 22 (4.2%)            | 7 (2.4%)                    | 15 (6.5%)       | 3 (2.9%)              |
| Doxepin                | Conditional | Psych            | 1 (0.2%)             | 1 (0.3%)                    | 0 (0%)          | 0 (0%)                |
| Esomeprazole           | Conditional | Gastrointestinal | 1 (0.2%)             | 0 (0%)                      | 1 (0.4%)        | 1 (1.0%)              |
| Famotidine             | Conditional | Gastrointestinal | 22 (4.2%)            | 13 (4.4%)                   | 9 (3.9%)        | 1 (1.0%)              |
| Fluoxetine             | Conditional | Psych            | 9 (1.7%)             | 3 (1.0%)                    | 6 (2.6%)        | 1 (1.0%)              |
| Furosemide             | Conditional | Cardiac          | 69 (13.1%)           | 43 (14.7%)                  | 26 (11.2%)      | 5 (4.8%)              |
| Hydrochlorothiazide*   | Conditional | Cardiac          | 107 (20.4%)          | 56 (19.1%)                  | 51 (22.0%)      | 6 (5.8%)              |
| Hydroxychloroquine     | Conditional | Other            | 3 (0.6%)             | 0 (0%)                      | 3 (1.3%)        | 0 (0%)                |
| Hydroxyzine            | Conditional | Other            | 13 (2.5%)            | 9 (3.1%)                    | 4 (1.7%)        | 0 (0%)                |
| Indapamide             | Conditional | Psych            | 1 (0.2%)             | 1 (0.3%)                    | 0 (0%)          | 0 (0%)                |
| Lansoprazole           | Conditional | Gastrointestinal | 2 (0.4%)             | 1 (0.3%)                    | 1 (0.4%)        | 1 (1.0%)              |
| Loperimide             | Conditional | Gastrointestinal | 1 (0.2%)             | 1 (0.3%)                    | 0 (0%)          | 0 (0%)                |
| Metoclopramide         | Conditional | Gastrointestinal | 1 (0.2%)             | 1 (0.3%)                    | 0 (0%)          | 0 (0%)                |
| Nelfinavir             | Conditional | Anti-infective   | 1 (0.2%)             | 0 (0%)                      | 1 (0.4%)        | 0 (0%)                |
| Olanzapine             | Conditional | Psych            | 2 (0.4%)             | 1 (0.3%)                    | 1 (0.4%)        | 0 (0%)                |
| Omeprazole             | Conditional | Gastrointestinal | 38 (7.2%)            | 22 (7.5%)                   | 16 (6.9%)       | 5 (4.8%)              |
| Pantoprazole           | Conditional | Gastrointestinal | 15 (2.9%)            | 7 (2.4%)                    | 8 (3.4%)        | 0 (0%)                |
| Paroxetine             | Conditional | Psych            | 12 (2.3%)            | 4 (1.4%)                    | 8 (3.4%)        | 0 (0%)                |
| Quetiapine             | Conditional | Psych            | 16 (3.0%)            | 5 (1.7%)                    | 11 (4.7%)       | 2 (1.9%)              |
| Quinine                | Conditional | Cardiac          | 2 (0.4%)             | 0 (0%)                      | 2 (0.9%)        | 0 (0%)                |
| Ranolazine             | Conditional | Cardiac          | 1 (0.2%)             | 1 (0.3%)                    | 0 (0%)          | 0 (0%)                |
| Sertraline             | Conditional | Psych            | 12 (2.3%)            | 6 (2.0%)                    | 6 (2.6%)        | 0 (0%)                |
| Solifenacin            | Conditional | Other            | 0 (0%)               | 0 (0%)                      | 0 (0%)          | 1 (1.0%)              |
| Torsemide              | Conditional | Cardiac          | 3 (0.6%)             | 2 (0.7%)                    | 1 (0.4%)        | 0 (0%)                |

|                                   |             |                  |           |           |           |          |
|-----------------------------------|-------------|------------------|-----------|-----------|-----------|----------|
| Trazodone                         | Conditional | Psych            | 26 (5.0%) | 12 (4.1%) | 14 (6.0%) | 1 (1.0%) |
| Ziprasidone                       | Conditional | Psych            | 1 (0.2%)  | 0 (0%)    | 1 (0.4%)  | 0 (0%)   |
| Aripiprazole                      | Possible    | Psych            | 5 (1.0%)  | 3 (1.0%)  | 2 (0.9%)  | 2 (1.9%) |
| Buprenorphine                     | Possible    | Neurologic       | 1 (0.2%)  | 0 (0%)    | 1 (0.4%)  | 0 (0%)   |
| Clozapine                         | Possible    | Psych            | 3 (0.6%)  | 1 (0.3%)  | 2 (0.9%)  | 0 (0%)   |
| Desipramine                       | Possible    | Psych            | 1 (0.2%)  | 0 (0%)    | 1 (0.4%)  | 0 (0%)   |
| Efavirenz                         | Possible    | Anti-infective   | 4 (0.8%)  | 2 (0.7%)  | 2 (0.9%)  | 0 (0%)   |
| Efavirenz/Emtricitabine/Tenofovir | Possible    | Anti-infective   | 1 (0.2%)  | 0 (0%)    | 1 (0.4%)  | 0 (0%)   |
| Lithium                           | Possible    | Psych            | 1 (0.2%)  | 0 (0%)    | 1 (0.4%)  | 0 (0%)   |
| Lopinavir/ritonavir               | Possible    | Anti-infective   | 1 (0.2%)  | 0 (0%)    | 1 (0.4%)  | 0 (0%)   |
| Mirtazapine                       | Possible    | Psych            | 14 (2.7%) | 9 (3.1%)  | 5 (2.2%)  | 1 (1.0%) |
| Nortriptyline                     | Possible    | Psych            | 6 (1.1%)  | 3 (1.0%)  | 3 (1.3%)  | 1 (1.0%) |
| Paliperidone                      | Possible    | Psych            | 1 (0.2%)  | 0 (0%)    | 1 (0.4%)  | 0 (0%)   |
| Promethazine                      | Possible    | Gastrointestinal | 4 (0.8%)  | 1 (0.3%)  | 3 (1.3%)  | 0 (0%)   |
| Rilpivirine                       | Possible    | Anti-infective   | 1 (0.2%)  | 0 (0%)    | 1 (0.4%)  | 0 (0%)   |
| Risperidone                       | Possible    | Psych            | 18 (3.4%) | 8 (2.7%)  | 10 (4.3%) | 2 (1.9%) |
| Tamoxifen                         | Possible    | Other            | 1 (0.2%)  | 1 (0.3%)  | 0 (0%)    | 0 (0%)   |
| Tetrabenazine                     | Possible    | Neurologic       | 1 (0.2%)  | 0 (0%)    | 1 (0.4%)  | 0 (0%)   |
| Vardenafil                        | Possible    | Other            | 5 (1.0%)  | 5 (1.7%)  | 0 (0%)    | 0 (0%)   |
| Venlafaxine                       | Possible    | Psych            | 10 (1.9%) | 1 (0.3%)  | 9 (3.9%)  | 2 (1.9%) |
| Amiodarone                        | Known       | Cardiac          | 8 (1.5%)  | 3 (1.0%)  | 5 (2.2%)  | 0 (0%)   |
| Azithromycin                      | Known       | Anti-infective   | 3 (0.6%)  | 0 (0%)    | 3 (1.3%)  | 0 (0%)   |
| Chlorpromazine                    | Known       | Gastrointestinal | 1 (0.2%)  | 1 (0.3%)  | 0 (0%)    | 0 (0%)   |
| Ciprofloxacin                     | Known       | Anti-infective   | 2 (0.4%)  | 2 (0.7%)  | 0 (0%)    | 0 (0%)   |
| Citalopram                        | Known       | Psych            | 11 (2.1%) | 3 (1.0%)  | 8 (3.4%)  | 2 (1.9%) |
| Clarithromycin                    | Known       | Anti-infective   | 1 (0.2%)  | 0 (0%)    | 1 (0.4%)  | 0 (0%)   |
| Donepezil                         | Known       | Neurologic       | 7 (1.3%)  | 4 (1.4%)  | 3 (1.3%)  | 1 (1.0%) |
| Erythromycin                      | Known       | Anti-infective   | 1 (0.2%)  | 1 (0.3%)  | 0 (0%)    | 0 (0%)   |
| Escitalopram                      | Known       | Psych            | 10 (1.9%) | 1 (0.3%)  | 9 (3.9%)  | 1 (1.0%) |
| Fluconazole                       | Known       | Anti-infective   | 3 (0.6%)  | 0 (0%)    | 3 (1.3%)  | 0 (0%)   |
| Haloperidol                       | Known       | Psych            | 2 (0.4%)  | 2 (0.7%)  | 0 (0%)    | 0 (0%)   |

|              |       |                  |           |          |            |          |
|--------------|-------|------------------|-----------|----------|------------|----------|
| Levofloxacin | Known | Anti-infective   | 9 (1.7%)  | 3 (1.0%) | 6 (2.6%)   | 0 (0%)   |
| Methadone    | Known | Neurologic       | 32 (6.1%) | 6 (2.0%) | 26 (11.2%) | 3 (2.9%) |
| Moxifloxacin | Known | Anti-infective   | 0 (0%)    | 0 (0%)   | 0 (0%)     | 1 (1.0%) |
| Ondansetron  | Known | Gastrointestinal | 7 (1.3%)  | 2 (0.7%) | 5 (2.2%)   | 1 (1.0%) |
| Paperivine   | Known | Neuro            | 1 (0.2%)  | 1 (0.3%) | 0 (0%)     | 0 (0%)   |
| Sotalol      | Known | Cardiac          | 3 (0.6%)  | 3 (1.0%) | 0 (0%)     | 0 (0%)   |
| Thioridazine | Known | Psych            | 1 (0.2%)  | 1 (0.3%) | 0 (0%)     | 0 (0%)   |

\*Including all multidrug combinations. Abbreviations: Non-SAD; non-sudden arrhythmic death; SAD, sudden arrhythmic death; SCD, sudden cardiac death.
